# Supplementary material for: Knowledge, Attitude and practices of the population in sennar city, sudan , regarding dengue fever and its prevention measures : Community based cross sectional study
Source: Research Square preprint supplement (doi:10.21203/rs.3.rs-2762604/v1), 2023-04-18
Supplement: Supplementary file 1 [file 6d9d704737e0dd367a97b73c.doc]

**KAP about dengue (Survey Questionnaire)**

***Socio-demographic profile:***

1. Age:

i. 1 - 15 ii. 16 – 30 iii. 31 – 45 iv. 46 – 60 v. > 60

2. Gender: i. Male ii. Female

3. Literacy status: i. No formal schooling ii. Primary iii. Secondary

iv. Intermediate v. Graduate vi. Post-Graduate

4. Employment status: Job holder/ Teacher/ Businessman/ Farmer/ Student/ Laborer/ Housewife/

Nothing as mention/ Others

5.Socio-economic status: Lower class/ Lower middle class/ Middle class/ Upper middle class/ Higher class.

***Knowledge about Dengue Fever:***

6. Have you ever heard about Dengue fever?

(i) Yes (ii) No

7. What is the cause of Dengue fever?

(i) Mosquito's bite (ii) Dirty drinking water (iii) Contaminated food

(iv) Others (v) Don't know

8. What type of mosquito is carrier of Dengue fever?

(i) Aedes (ii) Anopheles (iii) All types of mosquito (iv) Don’t know

9. At what time does the Dengue causing mosquito most likely bite?

(i) Sunrise/sunset (ii) Night (iii) Afternoon (iv) Don’t know

10. During which part of the year is Dengue most prevalent?

(i) Summers (ii) Rainy season

(iii) Autumn (iv) Winters

(v) Don't know

11. Is Dengue Transmissible?

(i) Yes (ii) No

12. How Dengue is transmitted?

(i) Human to human contact (ii) Blood transfusion

(iii) Needle stick injury (iv) Sharing of food/ clothes with the patient

(v) Don’t know

13. Where Aedes mosquito is breeding?

(i) In clean water (ii) In unclean water (iii) Don’t know

14. Does Dengue fever viral or Bacterial Disease?

(i) Yes (ii) No (iii) Don’t know

15. What are the signs and symptoms of Dengue fever?

High fever/ Severe body aches/ Nausea and vomiting/ Red spots on the body/ Diarrhoea/ Pain abdomen/ All of the above/ Don’t know

***Awareness about Dengue Fever:***

16. Do you aware about Dengue fever?

(i) Yes (ii) No

17. Do you feel that you are at risk of getting Dengue fever?

(i) Absolutely (ii) Maybe

(iii) No, I take all the precautions (iv) Don’t know

18. Do you know Aedes mosquito?

(i) Yes (ii) No

19.What do you do initially after noticing any symptoms of fever?

(i) Taking medicine without prescription

(ii) Taking medicine with prescription

(iii) Wait few more days to observe health condition

(iv) Do nothing

20. How do you feel generally after noticing you have infected with fever in the Dengue most preventing

time?

(i) Getting very scared (ii) Take it seriously

(iii) Take it normally (iv) Not scared at all (v) No experience

***Knowledge about Dengue Fever Treatment:***

21. Do you think Dengue fever is treatable?

(i) Yes (ii) No (iii) Don’t know

22. Do you know about primary treatment of Dengue fever without taking any medicine?

(i) Yes (ii) No

23. Do you think does a patient of Dengue require hospitalization?

Definitely/ Sometimes/ No, he can be treated at home/ No treatment required/ Don’t know

24. Do you know which tests are required to diagnose Dengue fever?

(i) Yes (ii) No

25. Do you think Dengue fever is death leading disease without treatment?

(i) Yes (ii) No (iii) Don’t know

26. When do you test after suffering from fever?

(i) Immediately (ii) After getting serious condition (iii) After a few days

(iv) Never do test (v) Didn't face yet

***Knowledge & Awareness about Dengue Fever Prevention:***

27. Do you think Dengue prevention is possible?

(i) Yes (ii) No (iii) Don’t know

28. Do you know the preventing ways of Dengue fever?

(i) Yes (ii) No

29. Do you think Dengue fever is curable without any treatment?

(i) Yes (ii) No (iii) Don’t know

30. Did/Do you take any step to prevent the reproduction of Aedes mosquito?

(i) Yes (ii) No

31. What are the following options you do to protect yourself against bite of mosquito?

(i) Use Mosquito Spray (vi) Keep neat & clean my surroundings

(ii) Use Mosquito Coil (vii) Use Mosquito Net

(iii) Use Mosquito Repellant/Cream (viii) Cover my body with long clothes

(iv) Keep closed Windows & Doors (ix) Do nothing

(v) Use Smoke to drive away mosquitoes

32. Did/Do you ever take any step to have uninfected from Dengue fever?

(i) Yes (ii) No

33. Did/Do you ever share your known Dengue preventing information to others for protecting themselves from dengue fever?

(i) Yes (ii) No

34. Where do you get information about Dengue fever prevention from?

(i) TV/radio

(ii) Health care professionals

(iii) Friends and family

(iv) Schools/ Colleges/ Universities

(v) Advertisements/ Billboards/ Banners

(vi) Newspapers/Social media

(vii) Others

(viii) Didn't get yet
